# Supplementary material
Source: Research Square preprint supplement (doi:10.21203/rs.3.rs-10051991/v1)
Supplement: Supplementary file 1 [file c26a7f2472a320bb98517d39.docx]

**Appendix A. Minimum Sample Size Estimation with G*Power**

| **F tests - Linear multiple regression: Fixed model, R² deviation from zero** | | | | |
| --- | --- | --- | --- | --- |
| **Analysis** | **Input** | | **Output** | |
| A priori: Compute required sample size | Effect size f² | 0.02 | Noncentrality parameter λ | 18.68 |
| α err prob | 0.05 | Critical F | 2.38 |
| Power (1-β err prob) | 0.95 | Numerator df | 4 |
| Denominator df | 292 |
| Number of predictors | 4 | Total sample size | 934 |
| Actual power | 0.95 |

**Appendix B. Results of Post-Hoc Marker-Variable Analysis (UB = 95%)**

| **Structural paths** | **Zero-order r** | **t** | **CMV-adjusted r** | **tadj** | **Decision** |
| --- | --- | --- | --- | --- | --- |
| PPR → OKS | 0.80 | 47.90 | 0.59 | 29.82 | Significant |
| PPR → SIT | 0.60 | 30.17 | 0.19 | 8.24 | Significant |
| OKS → SIT | 0.69 | 37.32 | 0.38 | 17.41 | Significant |
| PPR → ABS | 0.65 | 33.75 | 0.29 | 12.93 | Significant |
| OKS → ABS | 0.78 | 45.58 | 0.55 | 27.19 | Significant |
| SIT → ABS | 0.65 | 34.12 | 0.30 | 13.41 | Significant |
| PPR → CP | 0.76 | 43.14 | 0.51 | 24.36 | Significant |
| OKS → CP | 0.83 | 52.35 | 0.66 | 34.78 | Significant |
| SIT → CP | 0.68 | 36.49 | 0.36 | 16.39 | Significant |
| ABS → CP | 0.79 | 46.60 | 0.57 | 28.35 | Significant |
| PPR → TP | 0.58 | 29.23 | 0.16 | 6.96 | Significant |
| OKS → TP | 0.55 | 27.22 | 0.10 | 4.17 | Significant |
| SIT → TP | 0.47 | 22.41 | 0.00 | 0.00 | Not significant |
| ABS → TP | 0.51 | 24.78 | 0.01 | 0.61 | Not significant |
| CP → TP | 0.68 | 36.01 | 0.35 | 15.78 | Significant |
| **Notes.** ABS: absorption, CP: contextual performance, OKS: online knowledge sharing, PPR: perceived personal reputation, SIT: social interaction ties, TP: task performance. | | | | | |
